# Supplementary material for: Melting point–solubility–structure correlations in multicomponent crystals containing fumaric or adipic acid
Source: Royal Society of Chemistry journal article supplement (doi:10.1039/c4ce01298d), 2014-01-01
Supplement: c4ce01298d1.pdf [file c4ce01298d1.pdf]

## Electronic supplementary information

### Melting point–solubility–structure correlations in multicomponent crystals containing fumaric or adipic acid

Eustina Batisai, Alban Ayamine, Ornella E. Y. Kilinkissa and Nikoletta B. Báthori\*

*Crystal Engineering Research Unit, Department of Chemistry, Cape Peninsula University of Technology, P. O. Box 652, Cape Town, South Africa, 8000. E-mail: bathorin@cput.ac.za; Fax: +27 21 460 3854; Tel: +27 21 460 8354*

#### 1 Powder X-ray diffraction

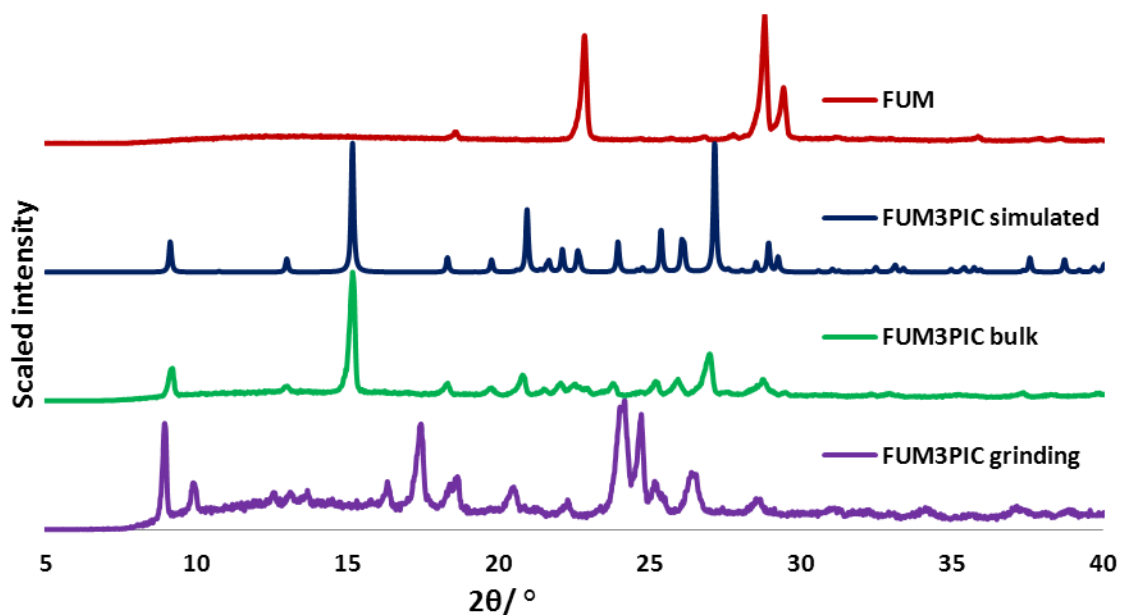

**Fig. S1** The PXRD patterns for **FUM** (red), **FUM3PIC** simulated (dark blue), **FUM3PIC** bulk (green) and **FUM3PIC** grinding (purple)

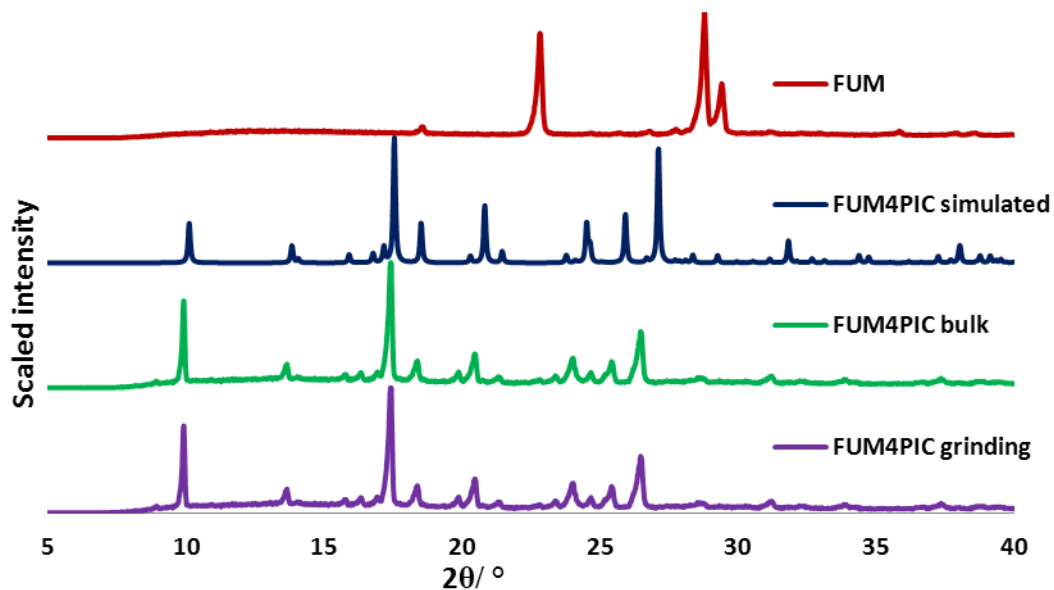

**Fig. S2** The PXRD patterns for **FUM** (red), **FUM4PIC** simulated (dark blue), **FUM4PIC** bulk (green) and **FUM4PIC** grinding (purple)

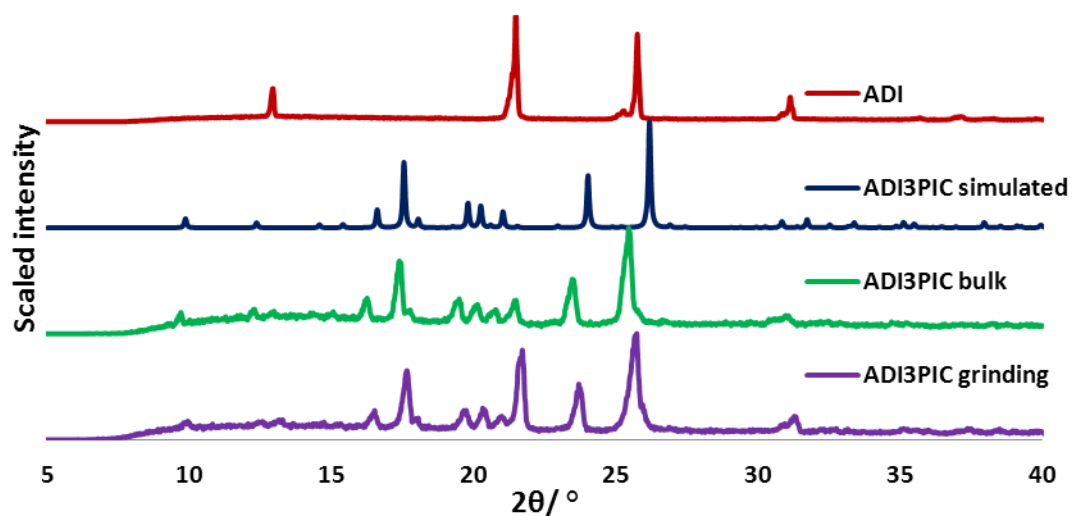

**Fig. S3** The PXRD patterns for **ADI** (red), **ADI3PIC** simulated (dark blue), **ADI3PIC** bulk (green) and **ADI3PIC** grinding (purple)

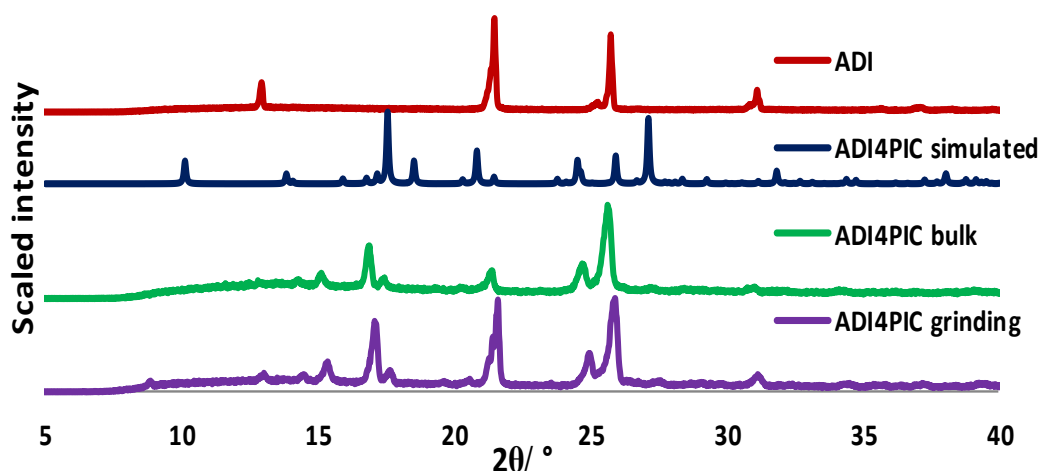

**Fig. S4** The PXRD patterns for **ADI** (red), **ADI4PIC** simulated (dark blue), **ADI4PIC** bulk (green) and **ADI4PIC** grinding (purple)

## 2 Solubility measurements

The solubility for each compound was measured in water and in ethanol. Each experiment was conducted in three parallel measurements, the occasionally obtained out of range results were excluded from the final average solubility calculation.

|                 | solvent | mass of vial | mass of vial+ solvent | mass of vial+ solvent+ compound | mass comp | mass of solvent | mass of paper | mass of paper+ mass of undissolved | mass of undissolved | mass of dissolved | volume of solvent | solubility | average | solubility    | average |
|-----------------|---------|--------------|-----------------------|---------------------------------|-----------|-----------------|---------------|------------------------------------|---------------------|-------------------|-------------------|------------|---------|---------------|---------|
|                 |         | (g)          | (g)                   | (g)                             | (g)       | (g)             | (g)           | (g)                                | (g)                 | (g)               | (mL)              | (g/g)      | (g/g)   | (mg/mL)       | (mg/mL) |
| <b>FUM</b>      | ethanol | 16.6701      | 20.6011               | 21.5552                         | 0.9541    | 3.9310          | 0.3252        | 1.1321                             | 0.8069              | 0.1472            | 4.9759            | 0.0374     |         | <b>29.58</b>  |         |
|                 |         | 15.1358      | 18.8558               | 19.7316                         | 0.8758    | 3.7200          | 0.3413        | 1.0327                             | 0.6914              | 0.1844            | 4.7089            | 0.0496     |         | <b>39.16</b>  |         |
|                 |         | 16.9641      | 20.8201               | 21.6190                         | 0.7989    | 3.8560          | 0.3615        | 0.9829                             | 0.6214              | 0.1775            | 4.8810            | 0.0460     | 0.04    | <b>36.37</b>  | 35.04   |
|                 | water   | 16.6609      | 19.6706               | 20.0710                         | 0.4004    | 3.0097          | 0.3294        | 0.6105                             | 0.2811              | 0.1193            | 3.0097            | 0.0396     |         | <b>39.64</b>  |         |
|                 |         | 15.2010      | 18.1124               | 18.5180                         | 0.4056    | 2.9114          | 0.3292        | 0.6480                             | 0.3188              | 0.0668            | 2.9114            | 0.0298     |         | <b>29.81</b>  |         |
|                 |         | 17.0229      | 19.8653               | 20.2652                         | 0.3999    | 2.8424          | 0.3151        | 0.5530                             | 0.2379              | 0.1620            | 2.8424            | 0.0570     | 0.04    | <b>56.99</b>  | 42.15   |
| <b>FUMDABCO</b> | ethanol | 13.8510      | 15.5649               | 16.6464                         | 1.0815    | 1.7139          | 0.3432        | 0.8855                             | 0.5424              | 0.5391            | 2.1695            | 0.4985     |         | <b>248.49</b> |         |
|                 |         | 14.1673      | 15.6614               | 16.7461                         | 1.0847    | 1.4941          | 0.3011        | 0.8341                             | 0.5330              | 0.5517            | 1.8913            | 0.5086     |         | <b>291.71</b> |         |
|                 |         | 13.8510      | 15.1281               | 16.2425                         | 1.1144    | 1.2771          | 0.3076        | 0.8123                             | 0.5047              | 0.6097            | 1.6166            | 0.5471     | 1.19    | <b>377.15</b> | 305.78  |
|                 | water   | 13.7865      | 14.7767               | 14.9289                         | 0.1522    | 1.0102          | 0.3166        | 0.3918                             | 0.0752              | 0.0770            | 1.0102            | 0.0762     |         | <b>76.22</b>  |         |
|                 |         | 13.7524      | 14.6618               | 14.7691                         | 0.1073    | 0.9094          | 0.3211        | 0.3885                             | 0.0674              | 0.0399            | 0.9094            | 0.0439     |         |               |         |
|                 |         | 13.9509      | 14.5545               | 14.6974                         | 0.1429    | 0.6036          | 0.3188        | 0.3925                             | 0.0737              | 0.0692            | 0.6036            | 0.1146     | 0.10    | <b>114.65</b> | 95.43   |
| <b>FUM3PIC</b>  | ethanol | 15.4212      | 17.0053               | 17.0851                         | 0.0798    | 1.5841          | 0.3178        | 0.3711                             | 0.0533              | 0.0265            | 2.0052            | 0.0167     |         | <b>13.22</b>  |         |
|                 |         | 16.2370      | 17.6657               | 17.7460                         | 0.0803    | 1.4287          | 0.3212        | 0.3711                             | 0.0499              | 0.0304            | 1.8085            | 0.0213     |         | <b>16.81</b>  |         |
|                 |         | 16.8957      | 18.1901               | 18.2578                         | 0.0677    | 1.2944          | 0.3211        | 0.3611                             | 0.0400              | 0.0277            | 1.6385            | 0.0214     | 0.02    | <b>16.91</b>  | 15.64   |
|                 | water   | 13.9674      | 14.6003               | 14.6917                         | 0.0914    | 0.6329          | 0.3218        | 0.3956                             | 0.0738              | 0.0176            | 0.6329            | 0.0278     |         | <b>27.81</b>  |         |
|                 |         | 14.0713      | 14.8703               | 14.9532                         | 0.0829    | 0.7990          | 0.3216        | 0.3723                             | 0.0507              | 0.0322            | 0.7990            | 0.0403     |         | <b>40.30</b>  |         |
|                 |         | 14.0714      | 15.0228               | 15.1492                         | 0.1264    | 0.9514          | 0.3207        | 0.4120                             | 0.0913              | 0.0351            | 0.9514            | 0.0369     | 0.04    | <b>36.89</b>  | 35.00   |
| <b>FUM4PIC</b>  | ethanol | 13.7017      | 14.1990               | 14.4066                         | 0.2076    | 0.4973          | 0.3208        | 0.3392                             | 0.0184              | 0.1892            | 0.6295            | 0.3805     |         | <b>300.56</b> |         |
|                 |         | 14.0104      | 14.6093               | 14.7338                         | 0.1245    | 0.5989          | 0.3143        | 0.3357                             | 0.0214              | 0.1031            | 0.7584            | 0.1724     |         |               |         |
|                 |         | 13.7647      | 14.1732               | 14.3556                         | 0.1624    | 0.4085          | 0.3186        | 0.3554                             | 0.0368              | 0.1256            | 0.5171            | 0.3075     | 0.34    | <b>242.90</b> | 271.73  |
|                 | water   | 14.1051      | 14.9759               | 15.4473                         | 0.4714    | 0.8708          | 0.3187        | 0.6855                             | 0.3669              | 0.1045            | 0.8708            | 0.1200     |         | <b>120.00</b> |         |
|                 |         | 13.7885      | 14.5708               | 15.2328                         | 0.6620    | 0.7823          | 0.3235        | 0.8123                             | 0.4888              | 0.1732            | 0.7823            | 0.2244     |         |               |         |
|                 |         | 14.1020      | 14.7718               | 15.2940                         | 0.5222    | 0.6698          | 0.3225        | 0.7423                             | 0.4198              | 0.1024            | 0.6698            | 0.1529     | 0.14    | <b>152.88</b> | 136.44  |

**Fig. S5** A summary of the aqueous and ethanol solubility measurements of the **FUM** series

|          | solvent | mass of vial (g) | mass of vial+ solvent (g) | mass of vial+ solvent+ compound (g) | mass of compound (g) | mass of solvent (g) | mass of paper (g) | mass of paper+ mass of undissolved (g) | mass of undissolved (g) | mass of dissolved (g) | volume of solvent (mL) | solubility (g/g) | average (g/g) | solubility (mg/mL) | average (mg/mL) |
|----------|---------|------------------|---------------------------|-------------------------------------|----------------------|---------------------|-------------------|----------------------------------------|-------------------------|-----------------------|------------------------|------------------|---------------|--------------------|-----------------|
| ADI      | ethanol | 13.8279          | 17.6718                   | 18.4694                             | 0.7976               | 3.8439              | 0.3428            | 0.7933                                 | 0.4505                  | 0.3471                | 4.8657                 | 0.0903           |               | 71.34              |                 |
|          |         | 13.7623          | 17.6136                   | 18.6775                             | 1.0639               | 3.8513              | 0.332             | 0.8724                                 | 0.5404                  | 0.5235                | 4.8751                 | 0.1359           |               | 107.38             |                 |
|          |         | 13.1592          | 17.5597                   | 18.1167                             | 0.5570               | 4.4005              | 0.3344            | 0.7544                                 | 0.4200                  | 0.1370                | 5.5703                 | 0.0314           | 0.11          | 89.36              |                 |
| ADI      | water   | 13.2500          | 15.1695                   | 18.8760                             | 1.0526               | 1.9195              | 0.8113            | 1.9418                                 | 0.8523                  | 0.2003                | 1.9195                 | 0.1044           |               | 104.35             |                 |
|          |         | 14.6989          | 16.4273                   | 18.9050                             | 1.0231               | 1.7284              | 0.8214            | 1.8909                                 | 0.7251                  | 0.2980                | 1.7284                 | 0.1724           |               | 172.41             |                 |
|          |         | 14.6989          | 17.1695                   | 19.2750                             | 2.1055               | 2.4706              | 0.8077            | 1.9777                                 | 1.1700                  | 0.9355                | 2.4706                 | 0.3796           | 0.14          | 138.38             |                 |
| ADIDABCO | ethanol | 13.9460          | 17.9403                   | 18.4288                             | 0.4885               | 3.9943              | 0.3247            | 0.6771                                 | 0.3524                  | 0.1361                | 5.0561                 | 0.0341           |               | 26.92              |                 |
|          |         | 14.3047          | 18.0278                   | 18.5487                             | 0.5209               | 3.7231              | 0.3236            | 0.6392                                 | 0.3156                  | 0.2053                | 4.7128                 | 0.0551           |               | 43.56              |                 |
|          |         | 14.5342          | 18.5342                   | 18.9763                             | 0.4421               | 4.0000              | 0.3238            | 0.6634                                 | 0.3396                  | 0.1025                | 5.0633                 | 0.0256           | 0.04          | 20.24              | 30.24           |
| ADIDABCO | water   | 13.9309          | 14.3775                   | 14.5302                             | 0.1527               | 0.4466              | 0.321             | 0.3912                                 | 0.0702                  | 0.0825                | 0.4466                 | 0.1847           |               | 184.73             |                 |
|          |         | 14.2037          | 14.7670                   | 14.9019                             | 0.1349               | 0.5633              | 0.319             | 0.3821                                 | 0.0631                  | 0.0718                | 0.5633                 | 0.1275           |               | 127.46             |                 |
|          |         | 13.7810          | 14.5563                   | 14.7152                             | 0.1589               | 0.7753              | 0.3181            | 0.4012                                 | 0.0831                  | 0.0758                | 0.7753                 | 0.0978           | 0.16          | 156.10             |                 |
| ADI3PIC  | ethanol | 13.7546          | 14.7094                   | 15.0236                             | 0.3142               | 0.9548              | 0.3232            | 0.4458                                 | 0.1226                  | 0.1916                | 1.2086                 | 0.2007           |               | 158.53             |                 |
|          |         | 13.7868          | 14.5405                   | 14.8323                             | 0.2918               | 0.7537              | 0.3245            | 0.4674                                 | 0.1429                  | 0.1489                | 0.9541                 | 0.1976           |               | 156.07             |                 |
|          |         | 14.0075          | 14.8819                   | 15.1340                             | 0.2521               | 0.8744              | 0.3105            | 0.4185                                 | 0.1080                  | 0.1441                | 1.1068                 | 0.1648           | 0.19          | 130.19             | 148.26          |
| ADI3PIC  | water   | 13.9671          | 14.4596                   | 14.5083                             | 0.0487               | 0.4925              | 0.3207            | 0.358                                  | 0.0373                  | 0.0114                | 0.4925                 | 0.0231           |               | 23.15              |                 |
|          |         | 14.1052          | 14.7866                   | 14.8332                             | 0.0466               | 0.6814              | 0.3176            | 0.3525                                 | 0.0349                  | 0.0117                | 0.6814                 | 0.0172           |               | 17.17              |                 |
|          |         | 13.9509          | 14.6403                   | 14.6923                             | 0.0520               | 0.6894              | 0.3157            | 0.3552                                 | 0.0395                  | 0.0125                | 0.6894                 | 0.0181           | 0.02          | 18.13              | 19.48           |
| ADI4PIC  | ethanol | 13.7022          | 16.7818                   | 16.8909                             | 0.1091               | 3.0796              | 0.4992            | 0.5192                                 | 0.0200                  | 0.0891                | 3.8982                 | 0.0289           |               | 22.86              |                 |
|          |         | 14.0764          | 17.5585                   | 17.6059                             | 0.0494               | 3.4801              | 0.3904            | 0.4062                                 | 0.0158                  | 0.0336                | 4.4052                 | 0.0097           |               | 9.97               |                 |
|          |         | 13.8939          | 17.0270                   | 17.1112                             | 0.0842               | 3.1331              | 0.5107            | 0.5259                                 | 0.0152                  | 0.0690                | 3.9659                 | 0.0220           | 0.03          | 17.40              | 20.13           |
| ADI4PIC  | water   | 13.8883          | 14.2268                   | 14.4631                             | 0.2363               | 0.3385              | 0.3185            | 0.3959                                 | 0.0774                  | 0.1589                | 0.3385                 | 0.4684           |               | 468.4              |                 |
|          |         | 14.3016          | 14.9576                   | 15.1790                             | 0.2214               | 0.6560              | 0.3218            | 0.397                                  | 0.0752                  | 0.1462                | 0.6560                 | 0.2229           |               | 222.87             |                 |
|          |         | 13.8386          | 14.2597                   | 14.4497                             | 0.1900               | 0.4211              | 0.3183            | 0.3899                                 | 0.0716                  | 0.1184                | 0.4211                 | 0.2812           | 0.25          | 281.17             | 252.02          |

**Fig. S6** A summary of the aqueous and ethanol solubility measurements of the ADI series

### 3 Differential scanning calorimetry

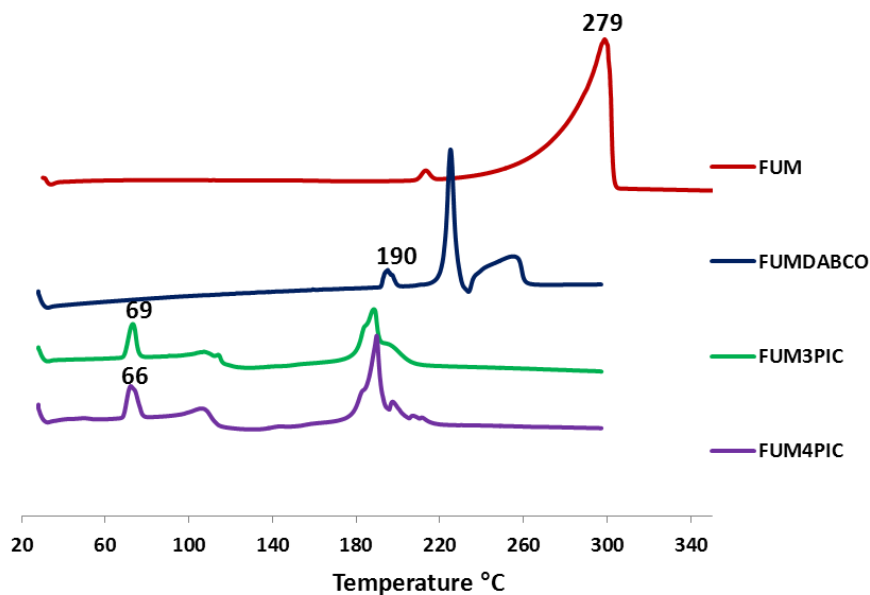

**Fig. S7** The DSC thermograms (endo up) for **FUM** (red), **FUMDABCO** (dark blue), **FUM3PIC** (green) and **FUM4PIC** (purple)

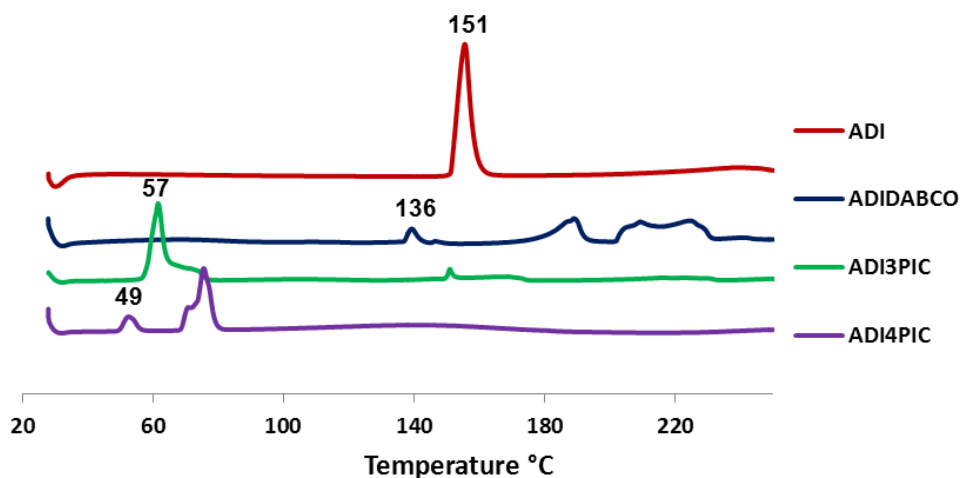

**Fig. S8** The DSC thermograms (endo up) for **ADI** (red), **ADIDABCO** (dark blue), **ADI3PIC** (green) and **ADI4PIC** (purple)

#### 4 Hirshfeld surface analysis

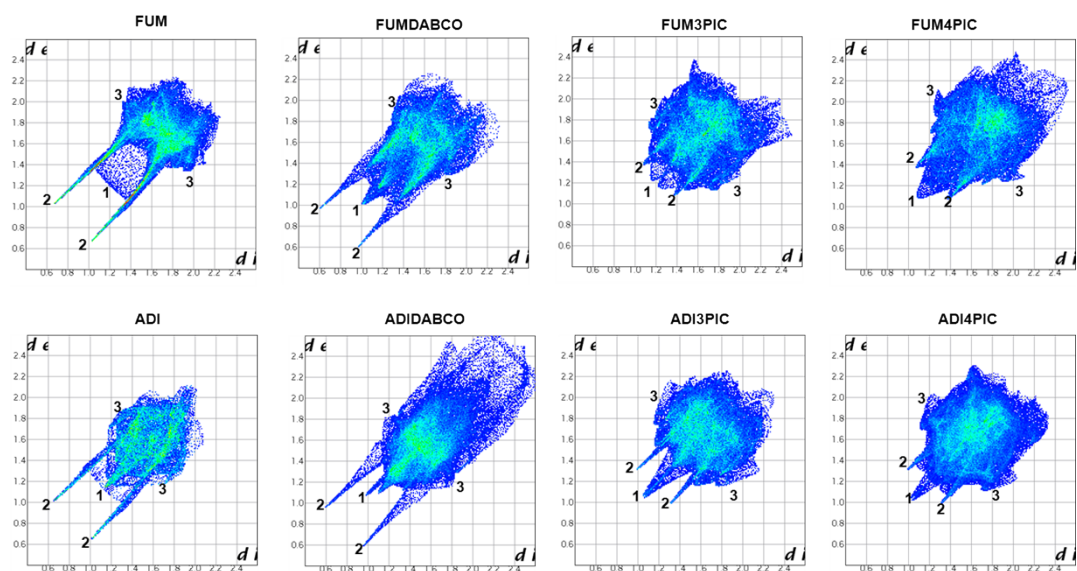

**Fig. S9** The 2D plots derived from Hirshfeld surface analysis for **FUM**, **FUMDABCO**, **FUM3PIC**, **FUM4PIC**, **ADI**, **ADIDABCO**, **ADI3PIC** and **ADI4PIC**. Spikes labelled 1-3 represent the H...H, O...H and C...H interactions
